# Supplementary material for: Olive Leaf Polyphenols Attenuate the Clinical Course of Experimental Autoimmune Encephalomyelitis and Provide Neuroprotection by Reducing Oxidative Stress, Regulating Microglia and SIRT1, and Preserving Myelin Integrity
Source: Hindawi journal article supplement (doi:10.1155/2020/6125638), 2020-07-31

Figure s1

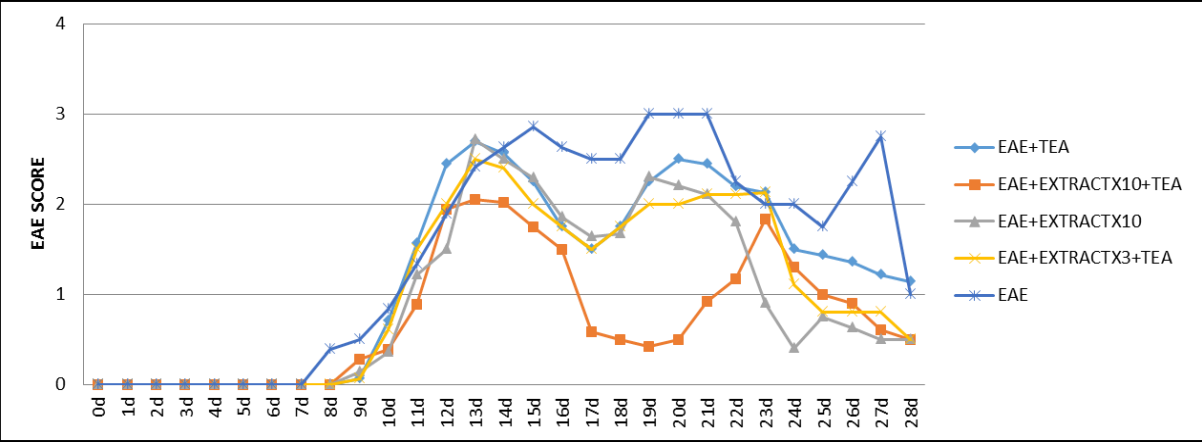

Figure s2

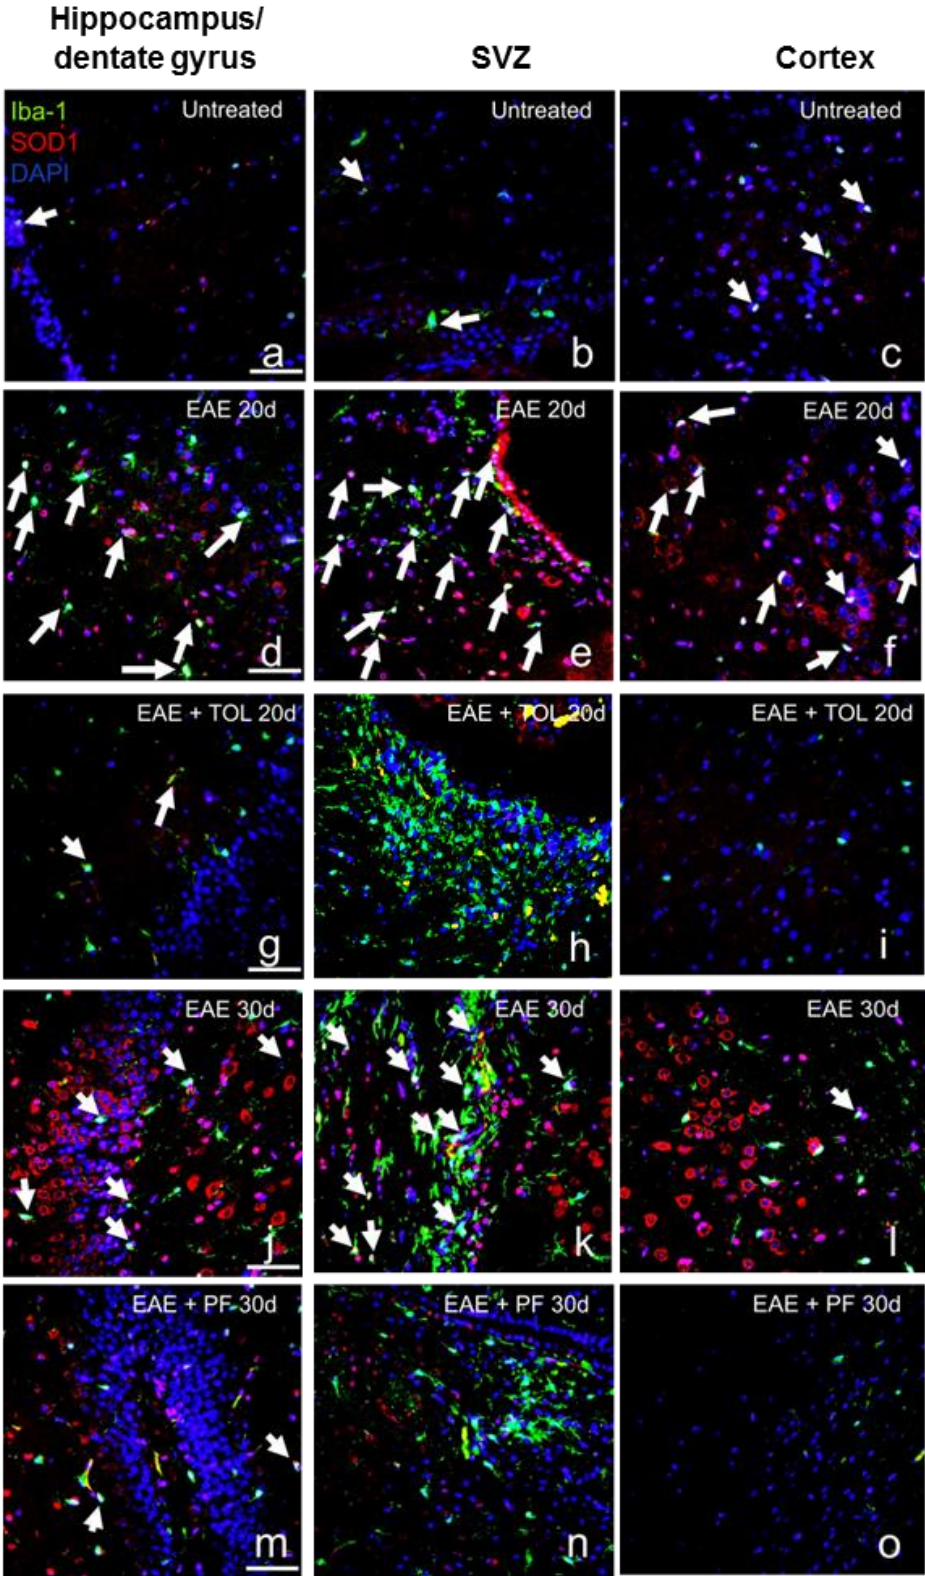

Figure s3

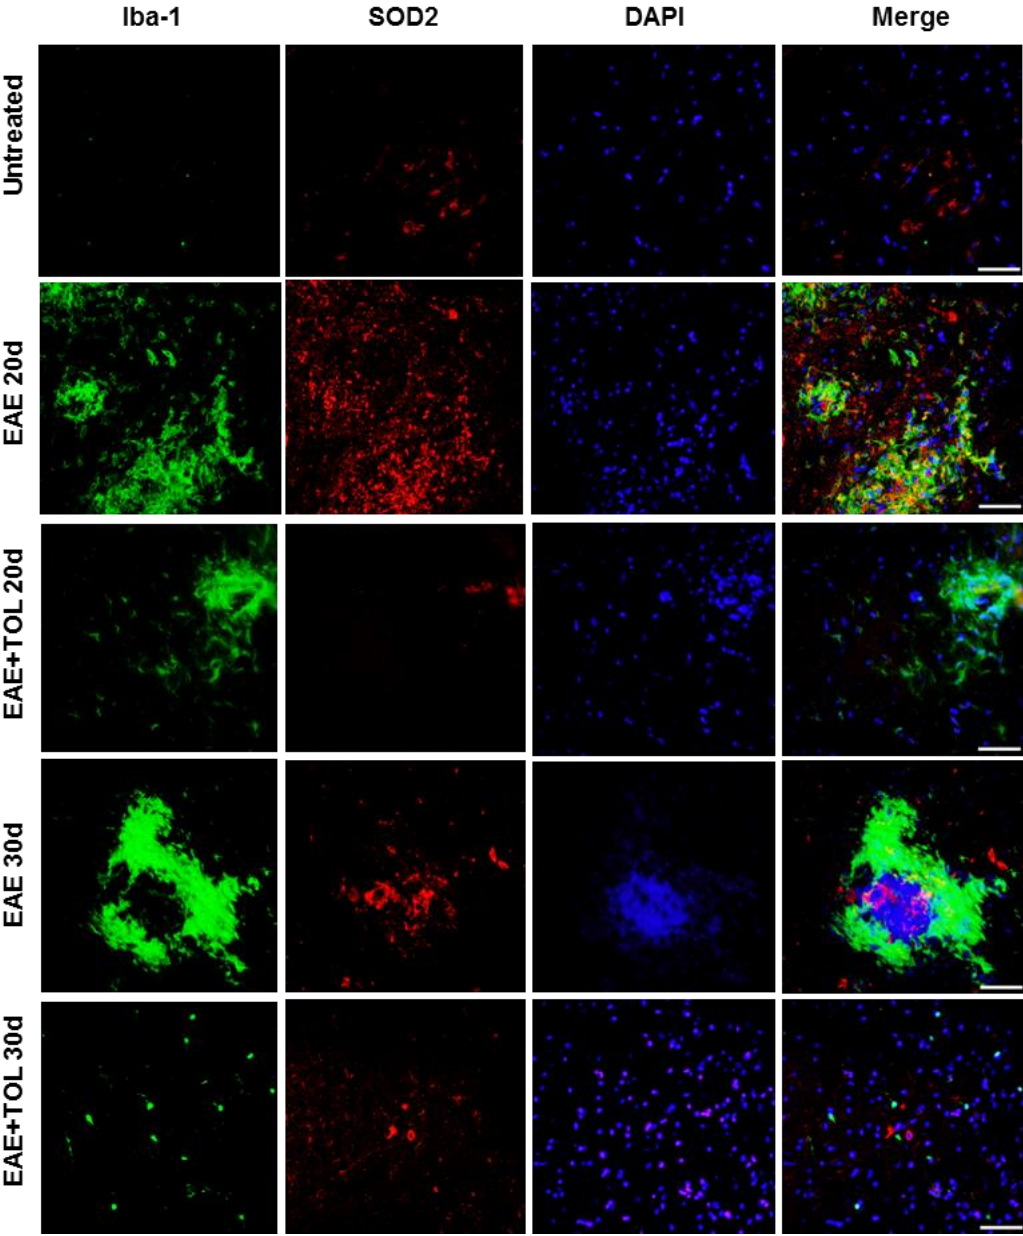

Figure s4

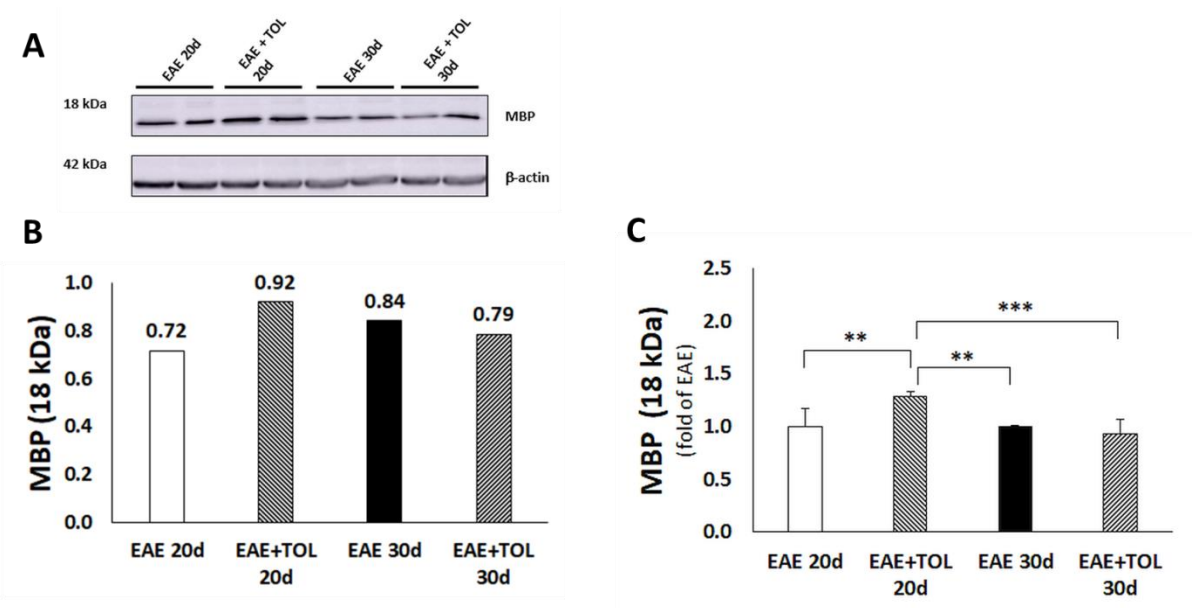

Supplement: f1 [file 6125638.f1.pdf]
